# Supplementary material for: Characterization of the nitrogen-transforming microbial community in the biofilms of a full-scale rotating biological contactor system treating wastewater from a fresh market building
Source: Royal Society of Chemistry journal article supplement (doi:10.1039/d2ew00204c), 2022-01-01
Supplement: d2ew00204c1.pdf [file d2ew00204c1.pdf]

## Supplementary Information

### **Characterization of the nitrogen-transforming microbial community in the biofilms of a full-scale rotating biological contactor system treating wastewater from a fresh market building**

Prinpida Sonthiphand<sup>1</sup>, Chanon Panthapa<sup>2</sup>, Wuttichai Mhuantong<sup>3</sup>, Nampetch Charanaipayuk<sup>4</sup>, Pratamaporn Homyok<sup>2</sup>, Tawan Limpiyakorn<sup>2,5†</sup>

<sup>1</sup>Department of Biology, Faculty of Science, Mahidol University, Bangkok 10400, Thailand

<sup>2</sup>Department of Environmental Engineering, Faculty of Engineering, Chulalongkorn University, Bangkok 10330, Thailand

<sup>3</sup>National Center for Genetic Engineering and Biotechnology (BIOTEC), National Science and Technology Development Agency, Pathumthani 12120, Thailand

<sup>4</sup>International Program in Hazardous Substance and Environmental Management, Graduate School, Chulalongkorn University, Bangkok, Thailand

<sup>5</sup>Research Unit Control of Emerging Micropollutants in Environment, Chulalongkorn University, Bangkok 10330, Thailand

**Table S1.** Primers used in this study.

| Microorganism,<br>target gene    | Primer set                                 | Annealing temp (°C) |      | Reference |
|----------------------------------|--------------------------------------------|---------------------|------|-----------|
|                                  |                                            | PCR*                | qPCR |           |
| AOA, <i>amoA</i>                 | Arch- <i>amoA</i> F<br>Arch- <i>amoA</i> R | 53                  | 53   | (1)       |
| AOB, <i>amoA</i>                 | <i>amoA</i> -1F<br><i>amoA</i> -2R         | 56                  | 53   | (2)       |
| Anammox, 16S rRNA                | A438f<br>A684r                             | 55                  | 55   | (3)       |
| Comammox, <i>amoA</i>            | <i>comamoA</i> AF<br><i>comamoA</i> SR     | 58                  | 58   | (4)       |
| <i>Nitrospira</i> , <i>nxrB</i>  | <i>nxrB</i> 169f<br><i>nxrB</i> 638r       | 56.2                | 56   | (5)       |
| <i>Nitrobacter</i> , <i>nxrA</i> | F1 <i>nxrA</i><br>R2 <i>nxrA</i>           | 60                  | 55   | (6)       |
| <i>Nitrotoga</i> , 16S rRNA      | Ntoga124F<br>Ntoga1462R                    | 63                  | -    | (7)       |
| DNRA, <i>nrfA</i>                | <i>nrfA</i> 2aw<br><i>nrfA</i> R1          | 53                  | -    | (8)       |
|                                  | F1 <i>nrfA</i><br>R1 <i>nrfA</i>           | 45                  | -    | (9)       |

\*Primers were added with overhang adapters for sequencing analysis

forward overhang sequences: 5'TCGTCGGCAGCGTCAGATGTGTATAAGAGACAG-[locus-specific sequence]

reverse overhang sequences: 5'GTCTCGTGGGCTCGGAGATGTGTATAAGAGACAG-[locus-specific sequence]

## References

1. C.A. Francis, K. J. Roberts, J. M. Beman, A. E. Santoro, B. B. Oakley, Ubiquity and diversity of ammonia-oxidizing archaea in water columns and sediments of the ocean, *Proc. Natl. Acad. Sci. U. S. A.*, 2005, **102**(41), 14683.
2. J. H. Rotthauwe, K. P. Witzel, W. Liesack, The ammonia monooxygenase structural gene *amoA* as a functional marker: molecular fine-scale analysis of natural ammonia-oxidizing populations, *Appl. Environ. Microbiol.*, 1997, **63**(12), 4704-4712.
3. S. Humbert, J. Zopfi, and S. E. Tarnawski, Abundance of anammox bacteria in different wetland soils, *Environ. Microbiol. Rep.*, 2012, **4**, 484-490.
4. M. Wang, G. Huang, Z. Zhao, C. Dang, W. Liu, M. Zheng, Newly designed primer pair revealed dominant and diverse comammox *amoA* gene in full-scale wastewater treatment plants, *Bioresour. Technol.*, 2018, **270**, 580-587.
5. M. Pester, F. Maixner, D. Berry, T. Rattei, H. Koch, S. Lüscher, B. Nowka, A. Richter, E. Spieck, E. Lebedeva, A. Loy, M. Wagner, H. Daims, *NxrB* encoding the beta subunit of nitrite oxidoreductase as functional and phylogenetic marker for nitrite-oxidizing *Nitrospira*, *Environ. Microbiol.*, 2014, **16**(10), 3055-3071.
6. F. Poly, S. Wertz, E. Brothier, V. Degrange, First exploration of *Nitrobacter* diversity in soils by a PCR cloning-sequencing approach targeting functional gene *nxrA*, *FEMS Microbiol. Ecol.*, 2008, **63**(1), 132-140.
7. S. Lüscher, J. Schwarz, C. Gruber-Dorninger, *et al.*, *Nitrotoga*-like bacteria are previously unrecognized key nitrite oxidizers in full-scale wastewater treatment plants, *ISME J.*, 2015, **9**, 708-720.
8. A. Welsh, J. C. Chee-Sanford, L. M. Connor, F. E. Löffler, R. A. Sanford, Refined *NrfA* phylogeny improves PCR-based *nrfA* gene detection, *Appl. Environ. Microbiol.*, 2014, **80**(7), 2110-2119.
9. S. Mohan, M. Schmid, M. Jetten, J. Cole, Detection and widespread distribution of the *nrfA* gene encoding nitrite reduction to ammonia, a short circuit in the biological nitrogen cycle that competes with denitrification, *FEMS Microbiol. Ecol.*, 2004, **49**, 433-443.

**Table S2.** Diversity indices of T1 and T2 samples

|         | <b>T1</b> | <b>T2</b> |
|---------|-----------|-----------|
| Ace     | 1,319     | 1,477     |
| Chao1   | 1,325     | 1,480     |
| Shannon | 8.69      | 8.88      |

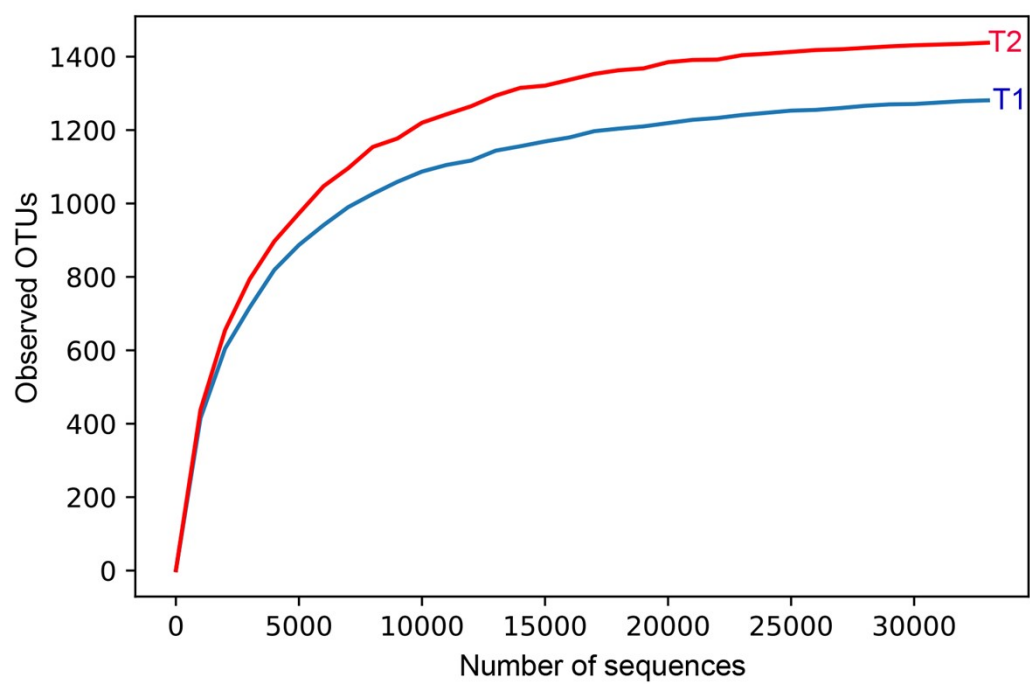

**Figure S1.** Rarefaction curves of T1 and T2 samples

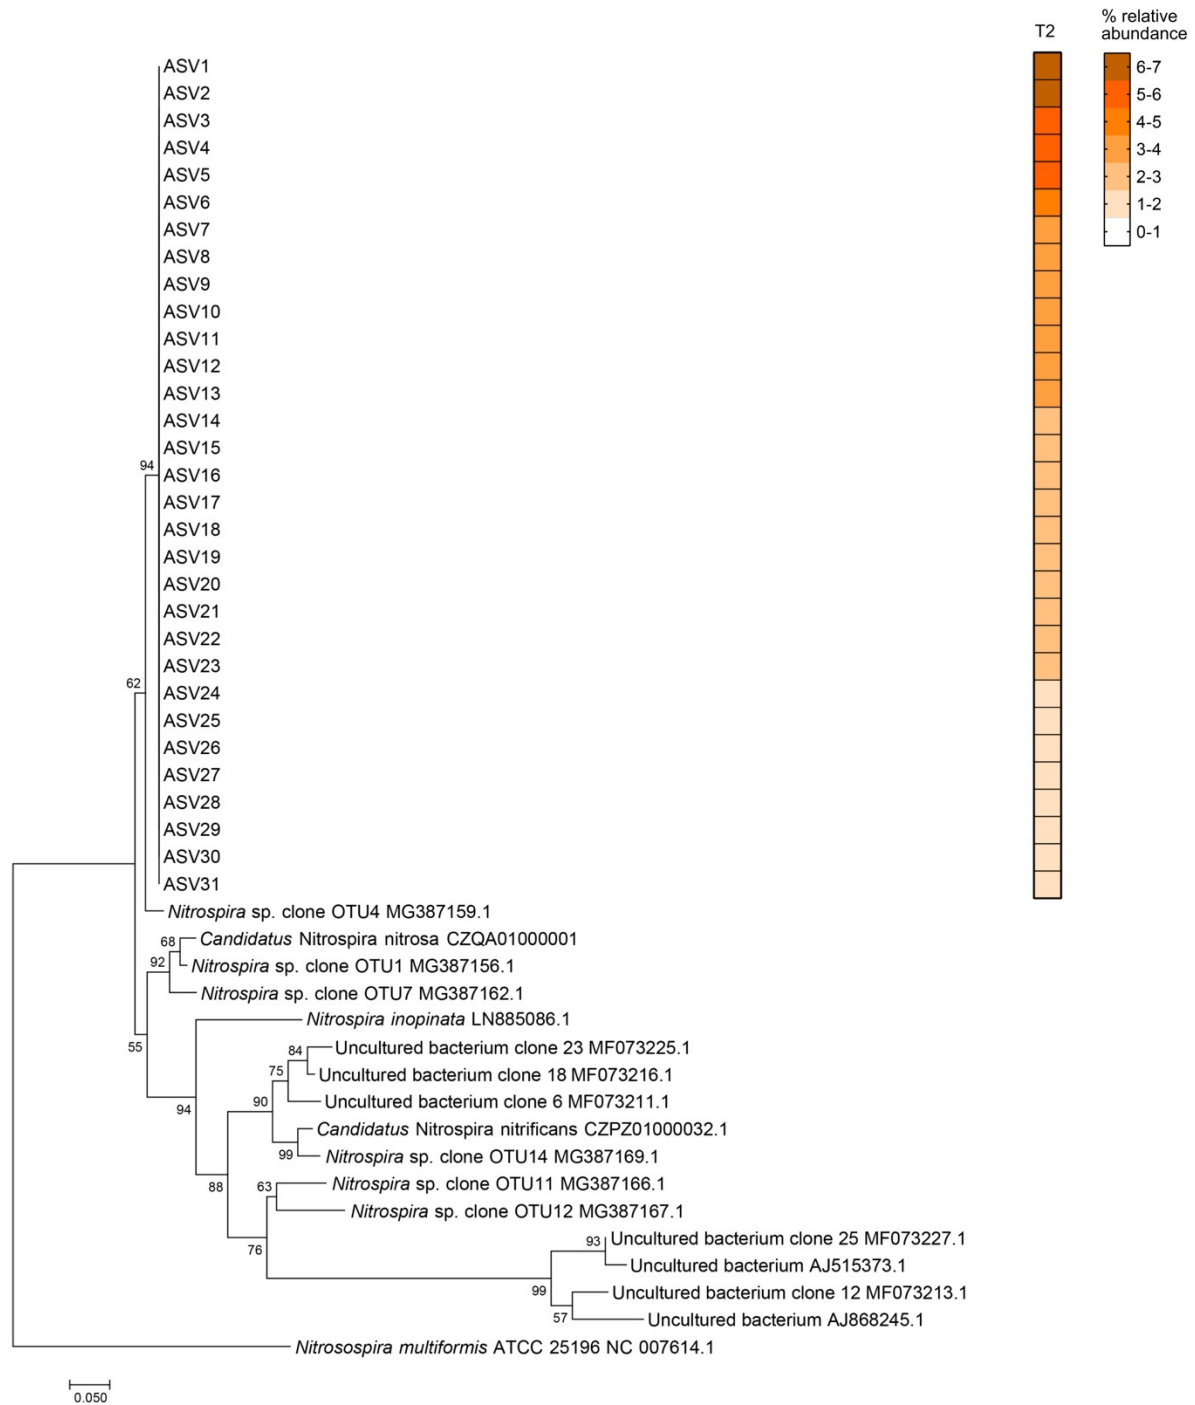

**Figure S2.** Neighbor-joining tree calculated based on sequences of comammox *amoA* gene fragments. The heat map on the right was generated based on the ASVs that show  $\geq 1\%$  relative abundance of sequences in the sample. In total,  $>94\%$  of the total sequences was included in the analysis.

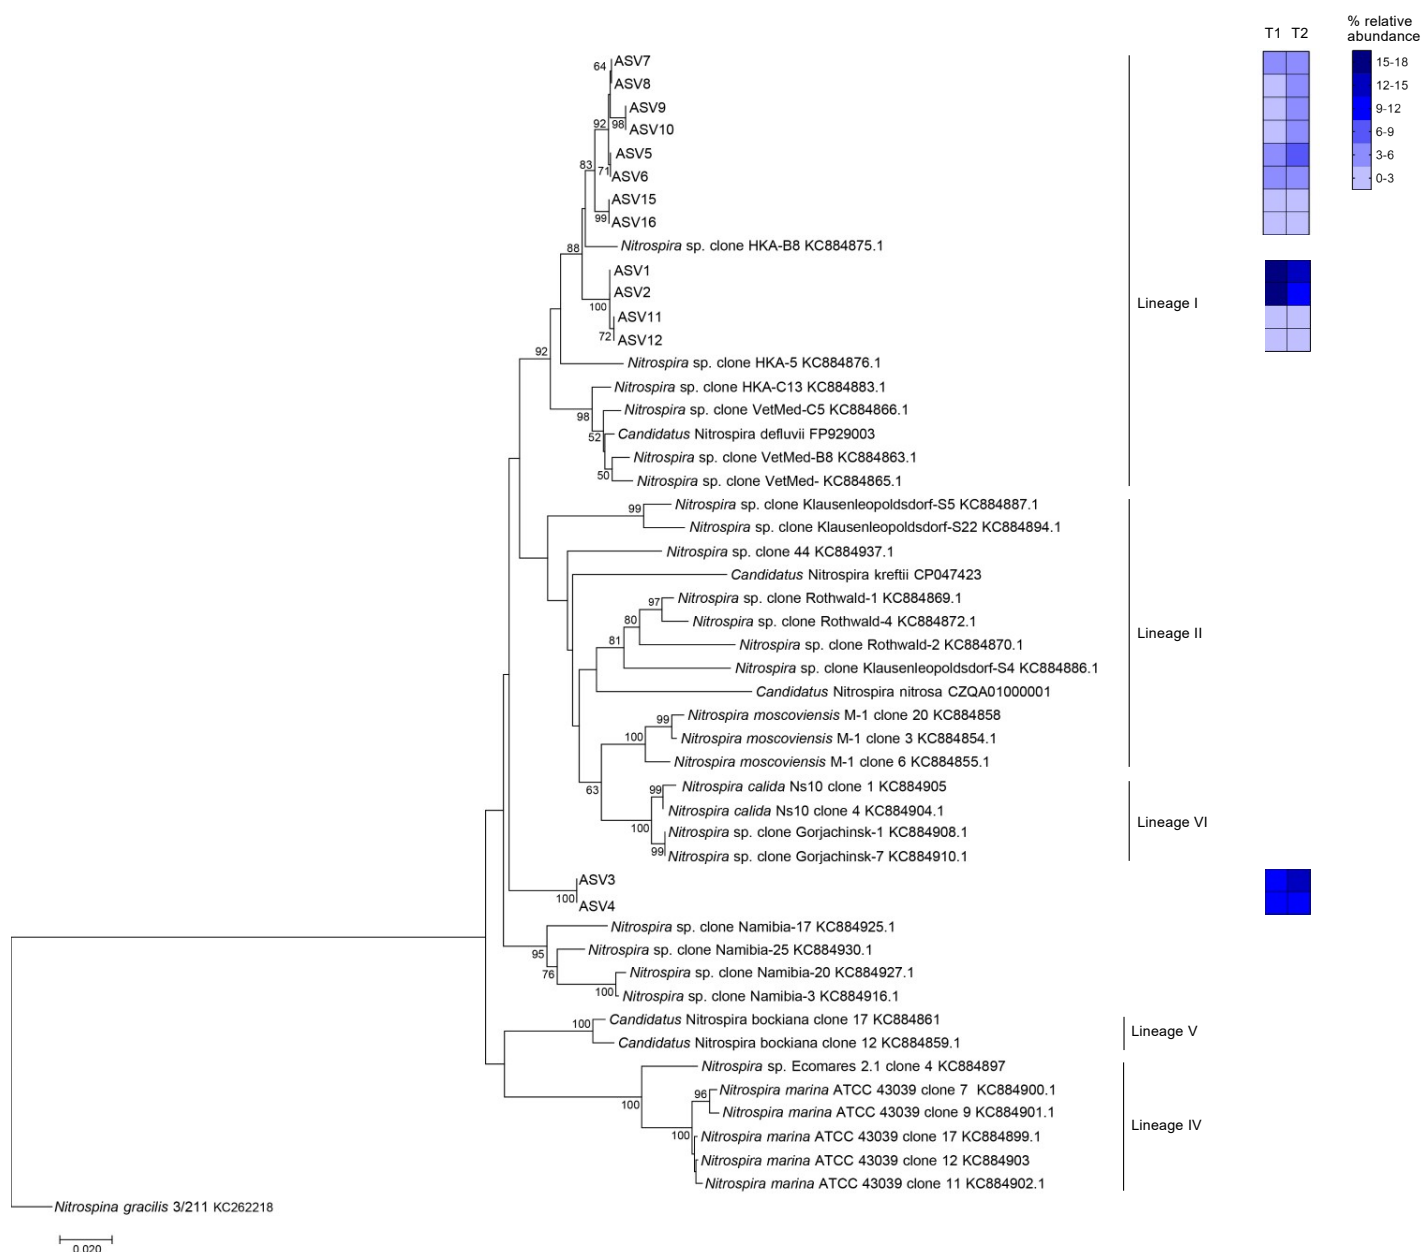

**Figure S3.** Neighbor-joining tree calculated based on sequences of *Nitrospira nxrB* gene fragments. The heatmap on the right was generated based on the ASVs that show  $\geq 1\%$  relative abundance of sequences in each sample. In total,  $>80\%$  of the total sequences were included in the analysis.
